# Supplementary material for: Silencing of Discoidin Domain Receptor-1 (DDR1) Concurrently Inhibits Multiple Steps of Metastasis Cascade in Gastric Cancer
Source: PubMed Central journal article supplement — Transl Oncol. 2018 Mar 13;11(3):575–84. doi: 10.1016/j.tranon.2018.02.003 (PMC5854925; doi:10.1016/j.tranon.2018.02.003), 2018-03-13
Supplement: mmc1.pdf [file mmc1.pdf]

**Supplementary Table. Primers used in this study for quantitative real time PCR**

|               | Direction | Primers                 |
|---------------|-----------|-------------------------|
| VEGF-A        | Forward   | cttgcttgetgctctacc      |
|               | Reverse   | cacacaggatggcttgaag     |
| VEGF-C        | Forward   | atgtgtgccgtctacagatgt   |
|               | Reverse   | ggaagtgtgattggcaaaactga |
| VEGF-D        | Forward   | gaggactggaagctgtggag    |
|               | Reverse   | atcggaacacgttcacacaa    |
| PDGF-B        | Forward   | cgagttggacctgaacatga    |
|               | Reverse   | gtcaccgtggccttcttaaa    |
| Angiotensin I | Forward   | gaagggaaccgagcctattc    |
|               | Reverse   | aggcacatttgcacataca     |
| IL8           | Forward   | gggttgtggagaagttttg     |
|               | Reverse   | gttctactggcatctcactg    |
